# Supplementary material
Source: publisher site journal article supplement (https://www.spandidos-publications.com/835/downloadSupplementary)

Figure S1. Image of monodansylcadaverine staining. The morphology of HL-1 cells viewed from an inverted microscope in the NC, NC + SWT, H, and H + SWT groups. The rulers in the photographs represent 100  $\mu$ m. NC, negative control; H, hypoxia; SWT, shock wave therapy.

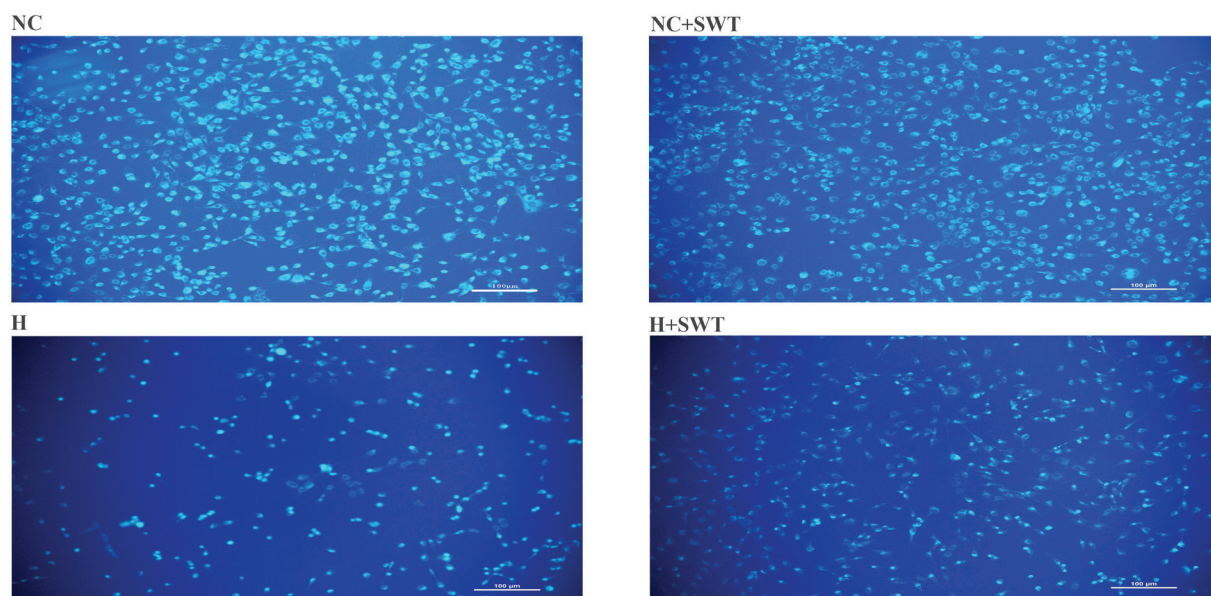

Figure S2. Reverse transcription-quantitative PCR analysis shows that miR-210 overexpression reduces mRNA expression levels of AIFM3 and Casp8ap2. miR-210 inhibitors increased mRNA expression levels of AIFM3 and Casp8ap2 in HL-1 cells. \* $P<0.05$ , \*\*\* $P<0.001$ . miR, microRNA; NC, negative control; Inh, inhibitors; AIFM3, apoptosis-inducing factor mitochondrion-associated 3; Casp8ap2, caspase 8 associated protein 2.

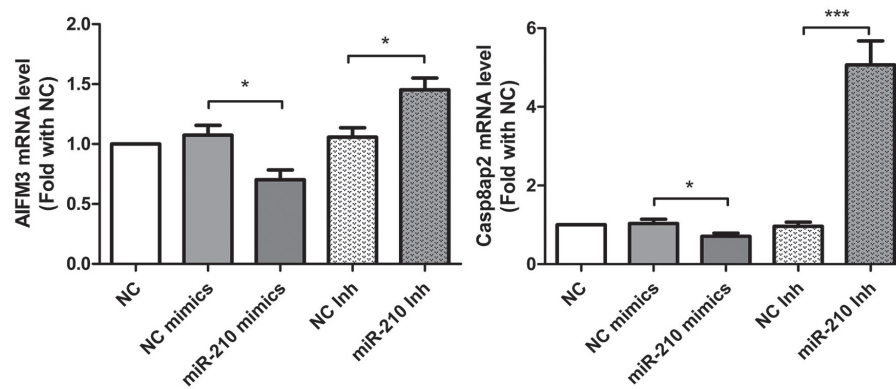

Supplement: Supplementary file 1 [file downloadSupplementary]
